# Supplementary material
Source: PubMed Central journal article supplement (PMC2409109)
Supplement: NIHMS40364-supplement-01.pdf [file NIHMS40364-supplement-01.pdf]

Supplemental Data

Learning to Link Visual Contours

Wu Li, Valentin Piëch, and Charles D. Gilbert

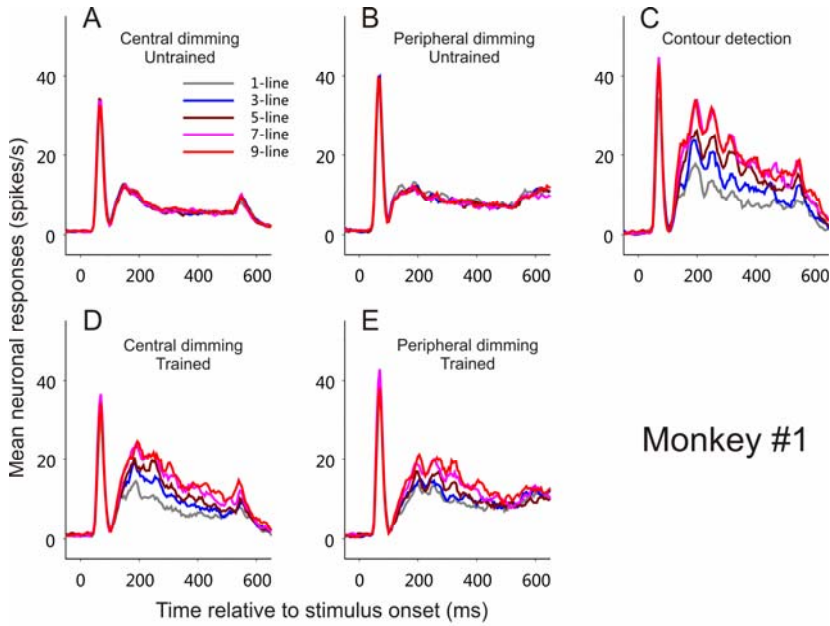

Monkey #1

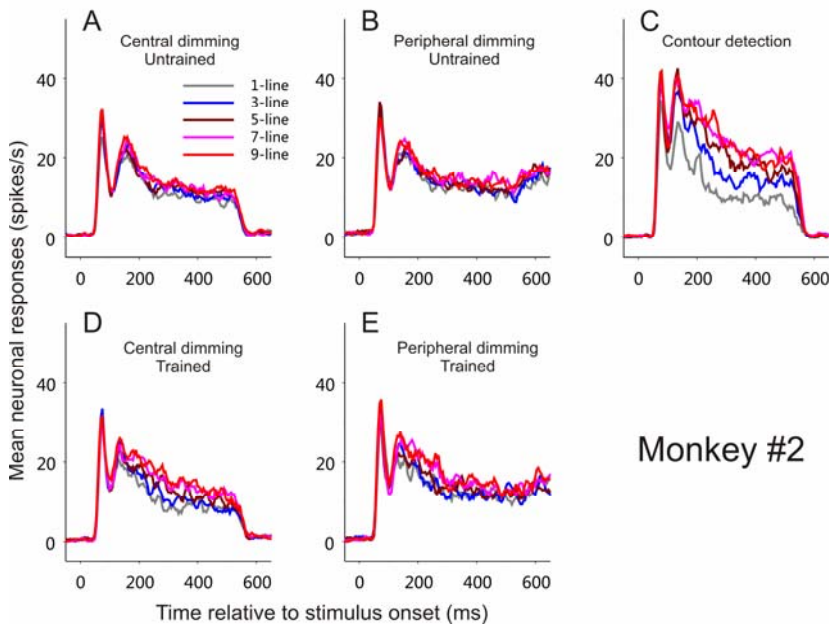

Monkey #2

**Figure S1. Population PSTHs Separated from the Animals**

Data were pooled across the two hemispheres for each of the two animals used. The PSTHs were constructed in a way similar to those shown in **Figures 3A-3E** and **4A-4E** (refer to the legends of **Figures 3 and 4** for details). The results from the two subjects are qualitatively similar in all experiments.
